# Supplementary material for: A Novel, LAT/Lck Double Deficient T Cell Subline J.CaM1.7 for Combined Analysis of Early TCR Signaling
Source: PubMed Central journal article supplement (PMC7915312; doi:10.3390/cells10020343), 2021-02-06

## LAT

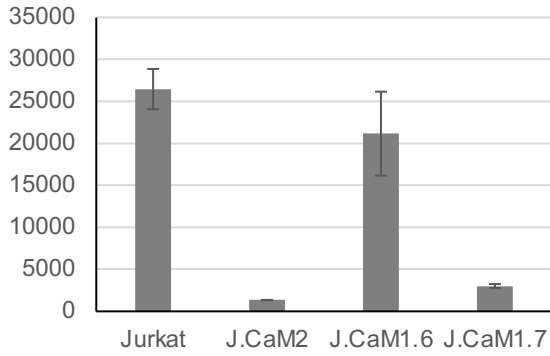

## Lck

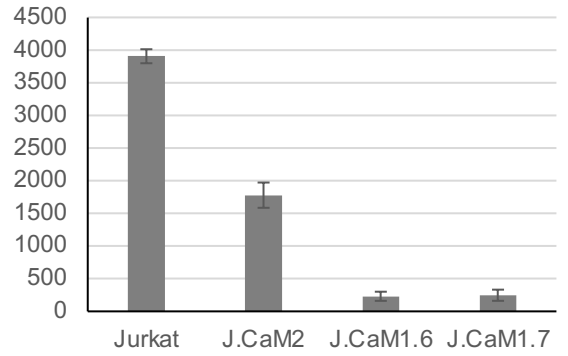

## ZAP-70

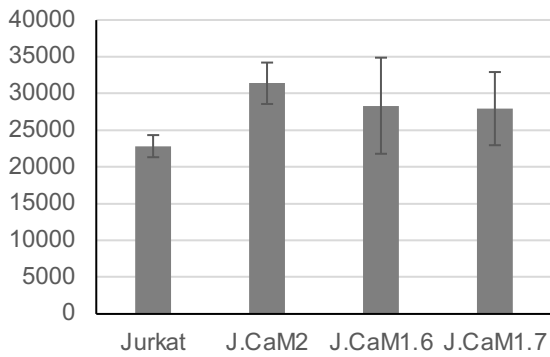

## Grb2

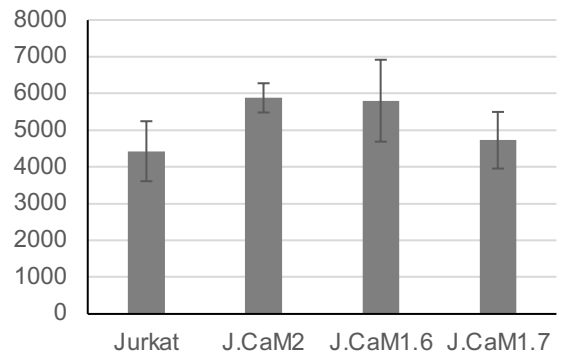

## $\beta$ -actin

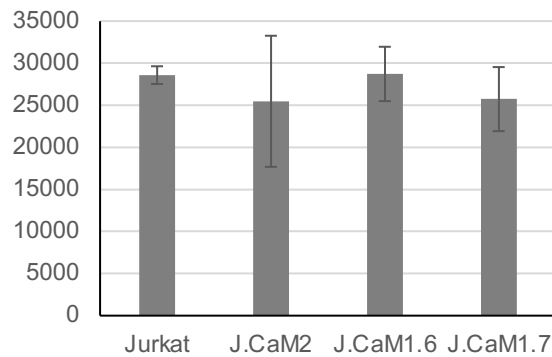

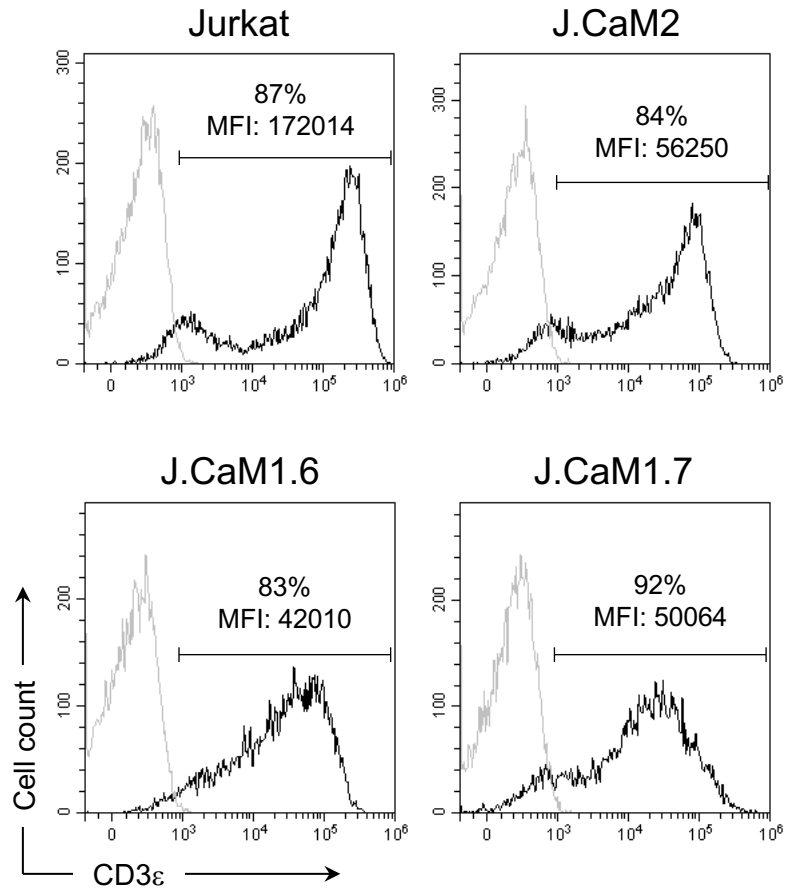

Supplementary Figure S2

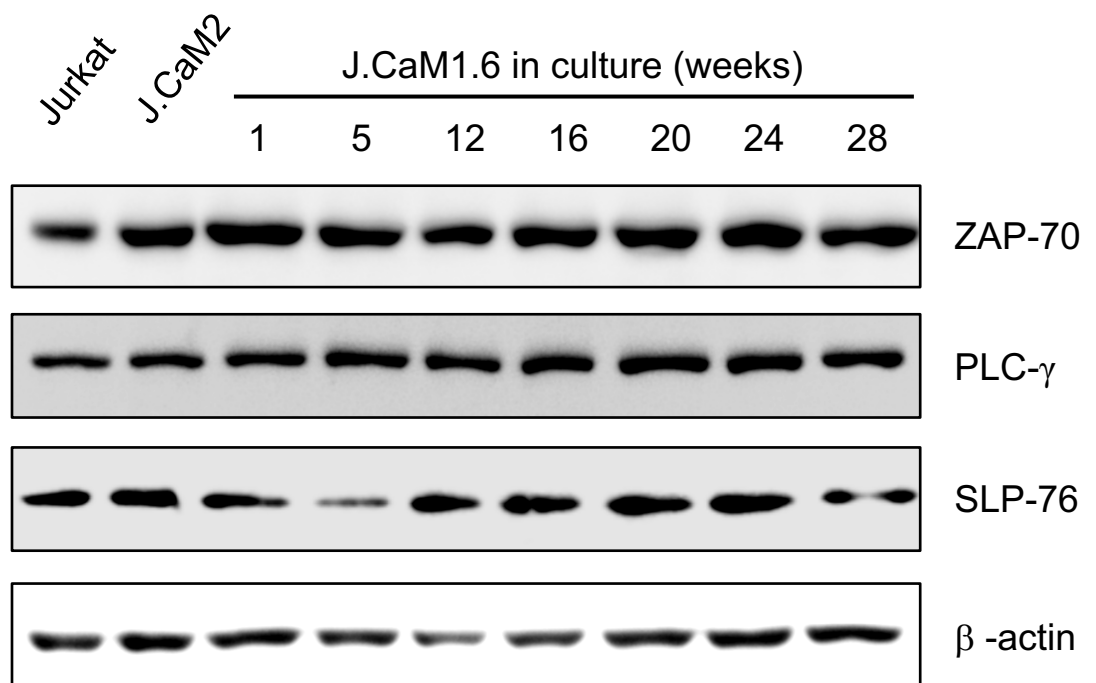

Supplementary Figure S3

# LAT-P-Y171

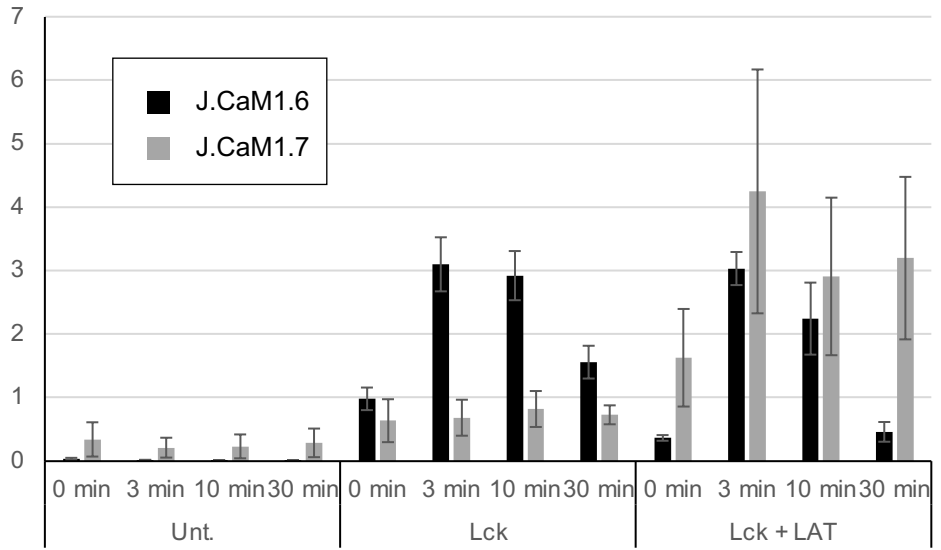

# P-PLC- $\gamma$

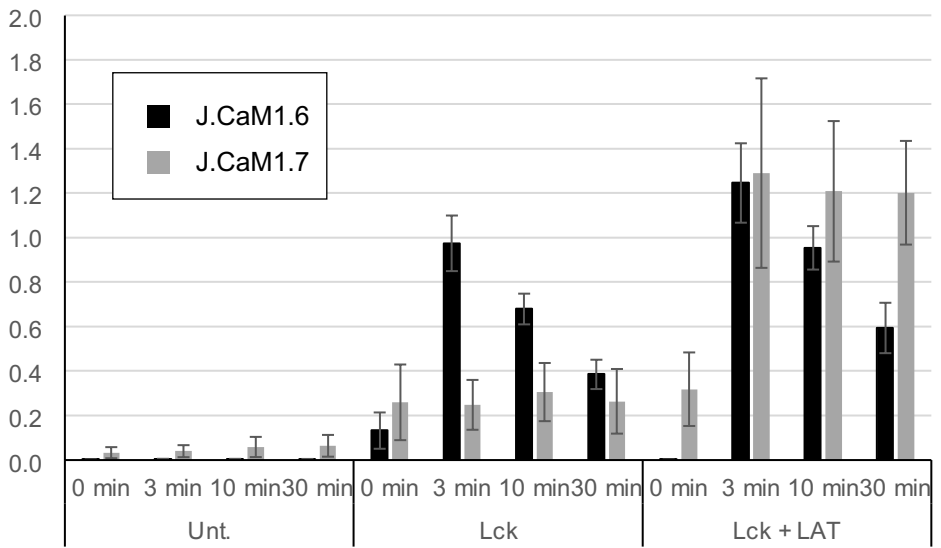

# P-Erk

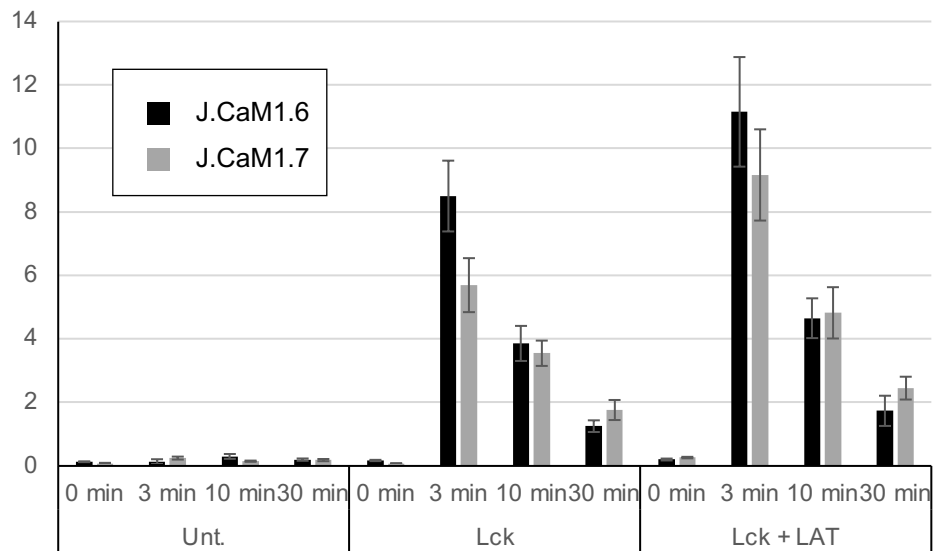

Supplement: cells-10-00343-s001.pdf [file cells-10-00343-s001.pdf]
